# Supplementary material for: A RuO2 nanoparticle-decorated buckypaper cathode for non-aqueous lithium–oxygen batteries
Source: Royal Society of Chemistry journal article supplement (doi:10.1039/c5ta06133d), 2015-01-01
Supplement: c5ta06133d1.pdf [file c5ta06133d1.pdf]

## **Supporting Information**

### **A RuO<sub>2</sub> nanoparticle-decorated buckypaper cathode for non-aqueous lithium-air batteries**

**P. Tan, W. Shyy, T. S. Zhao\*, X. B. Zhu and Z. H. Wei**

Department of Mechanical and Aerospace Engineering

The Hong Kong University of Science and Technology

Clear Water Bay, Kowloon, Hong Kong SAR, China

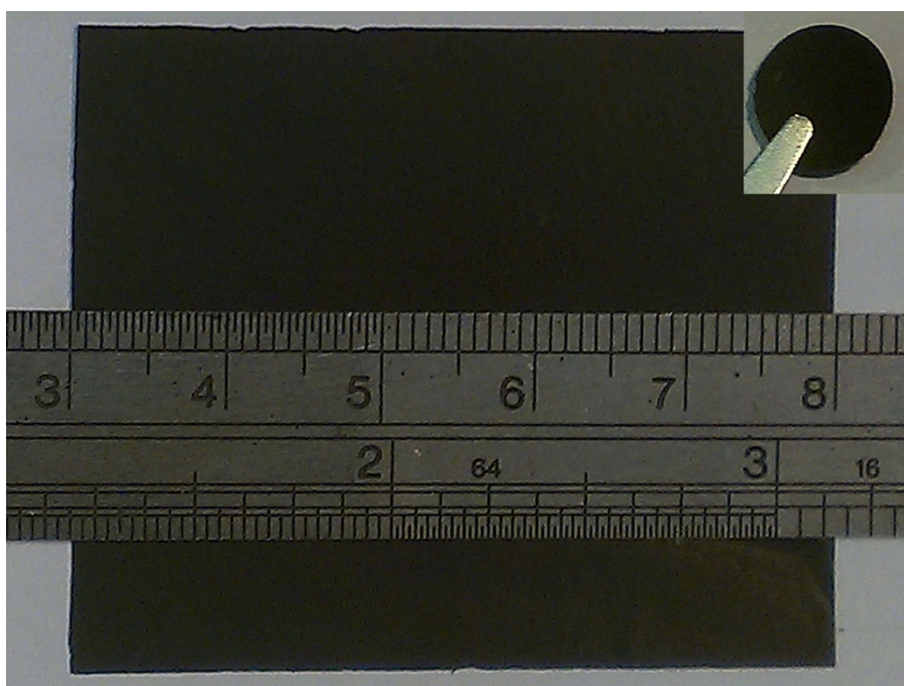

**Figure S1** Photograph of the as-received buckypaper, inset shows a disc-like cathode with a diameter of 8 mm.

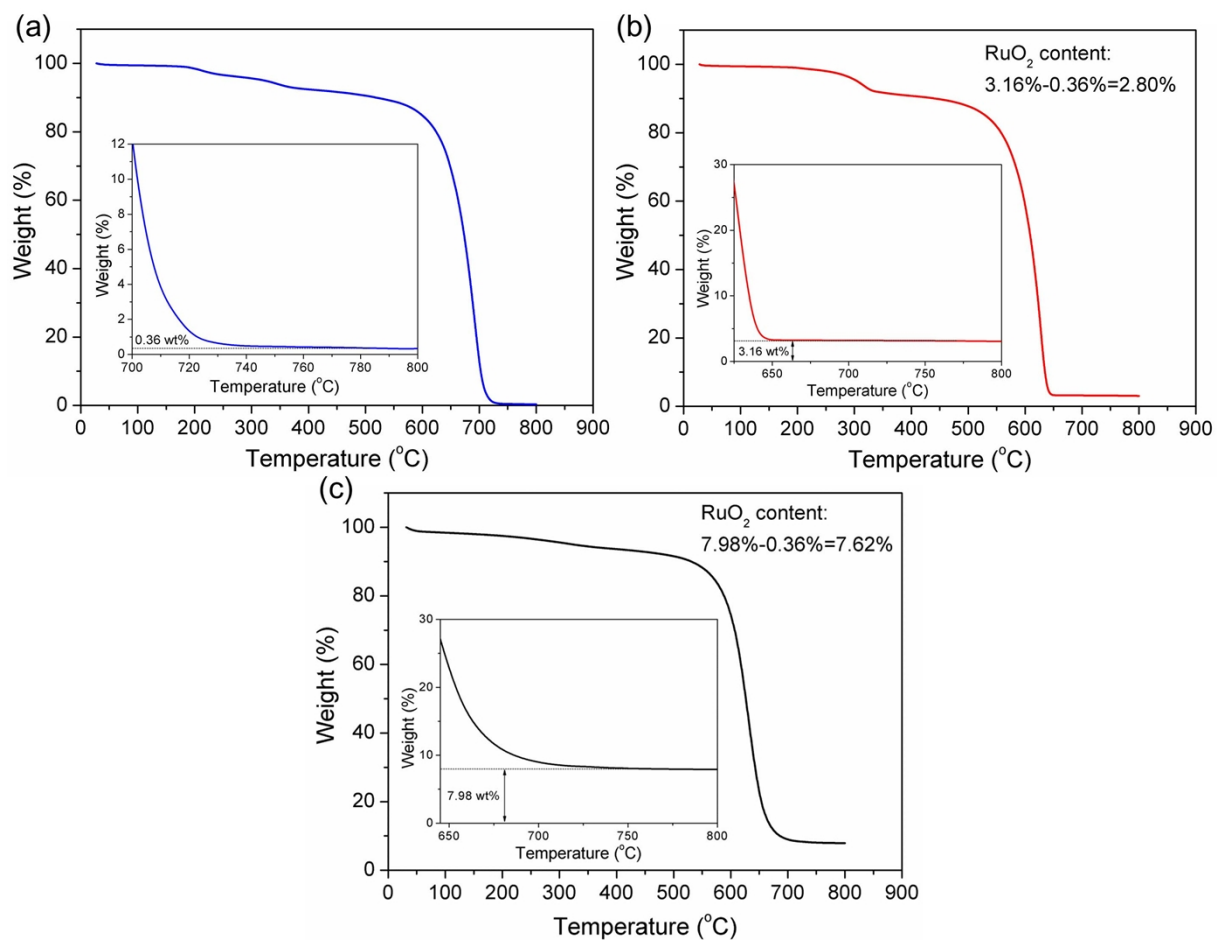

**Figure S2** TGA curves measured in air atmosphere from 25 °C to 800 °C at a heating rate of 10 °C per min: (a) Buckypaper and (b-c) RuO<sub>2</sub>/Buckypaper cathodes with different RuO<sub>2</sub> loadings.

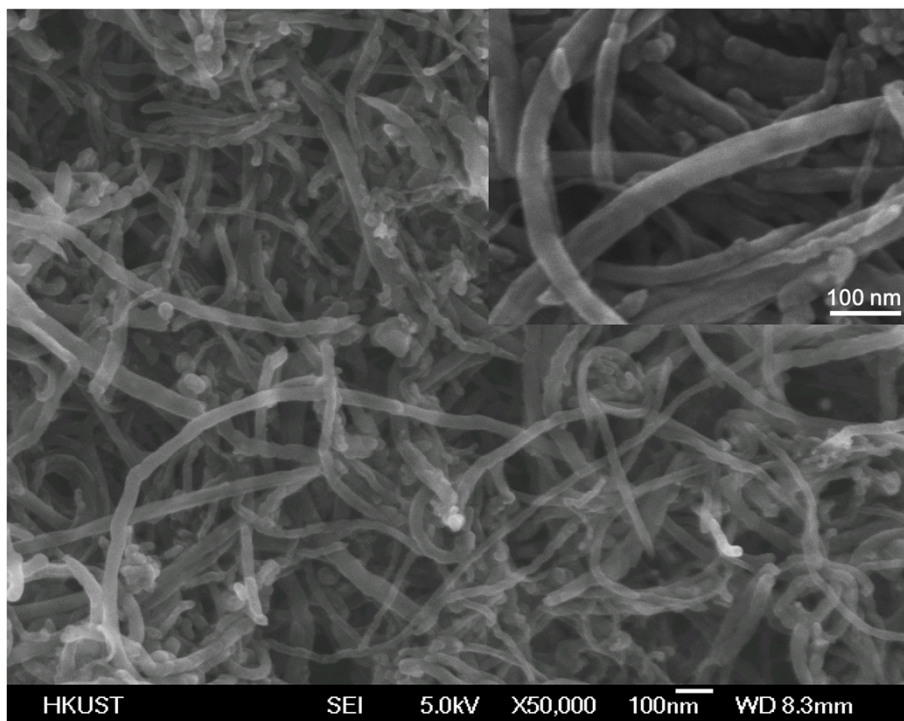

**Figure S3** The surface morphology of the Buckypaper cathode, carbon nanotubes with diameters of 20 to 60 nm are weaved to form the porous structure.

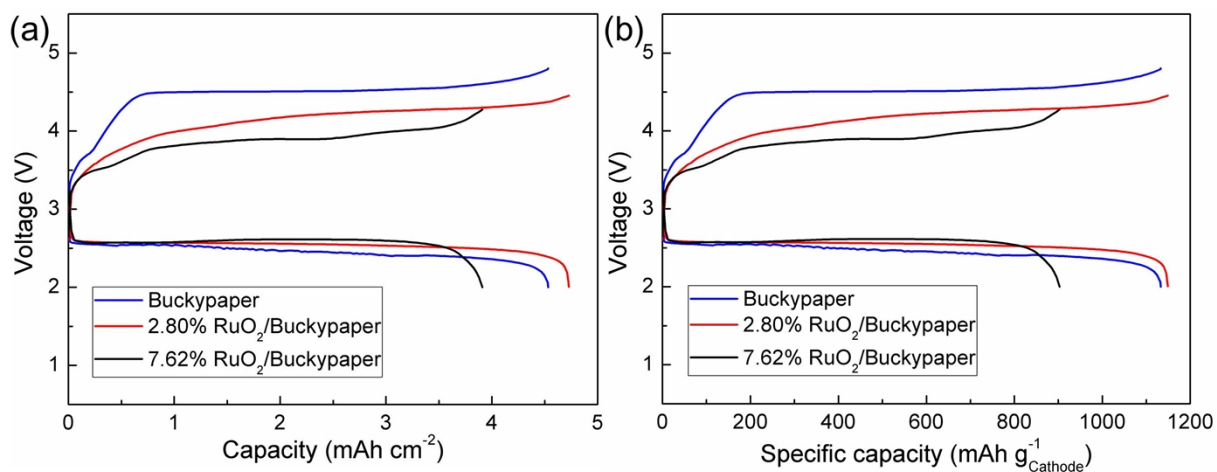

**Figure S4** Voltage curves of the cathodes with different RuO<sub>2</sub> loadings at the current density of 0.4 mA cm<sup>-2</sup> based on (a) the specific area and (b) the specific weight.

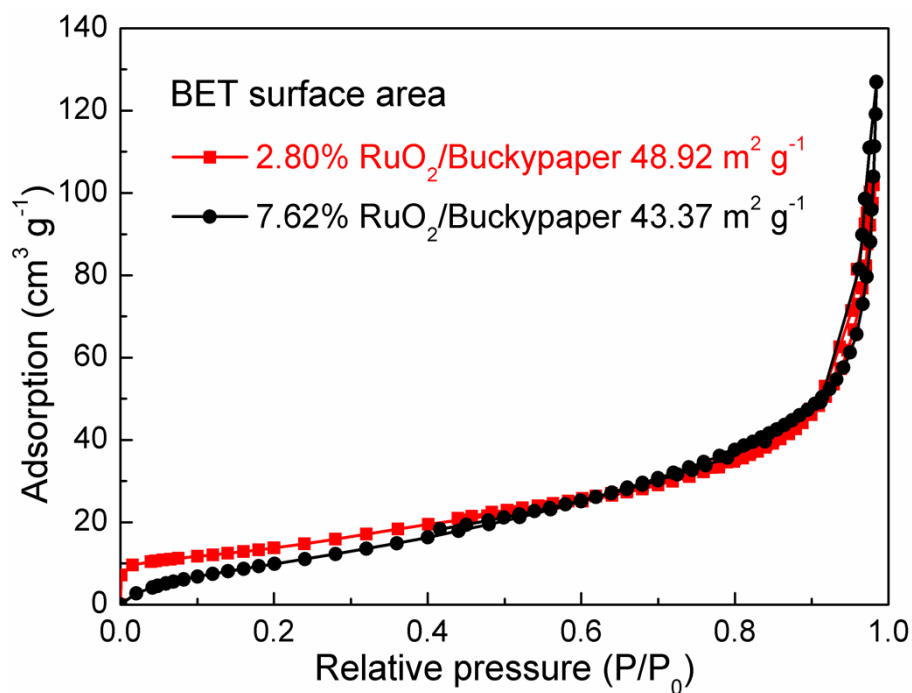

**Figure S5** Nitrogen-adsorption-desorption isotherms of the RuO<sub>2</sub>/Buckypaper cathodes with different RuO<sub>2</sub> loadings. With the loading of RuO<sub>2</sub> increases from 2.80% to 7.62%, the BET surface area decreases from 48.92 m<sup>2</sup> g<sup>-1</sup> to 43.37 m<sup>2</sup> g<sup>-1</sup>. The lower surface area at higher RuO<sub>2</sub> loading can be attributed to the dense RuO<sub>2</sub>.<sup>[1]</sup>

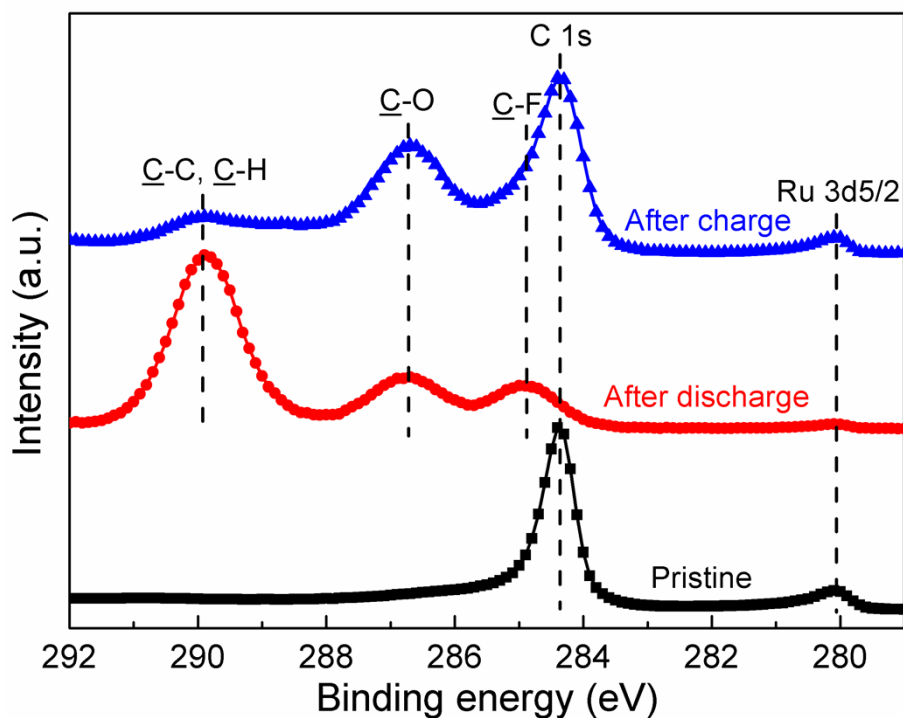

**Figure S6** XPS spectra of C 1s and Ru 3d of the RuO<sub>2</sub>/Buckypaper cathode after discharge and charge. The Ru 3d signal exists after discharge and charge, indicating that RuO<sub>2</sub> is stable during the cycling process. The C 1s XPS signal shows the existence of side products, which may be caused by the decomposition of electrolyte and carbon.<sup>[2]</sup> It is worth noting that after discharge, both the Ru 3d and C 1s peaks become weak. Thus, the disappearance of (002) peak related to RuO<sub>2</sub> after discharge process is due to the coverage of Li<sub>2</sub>O<sub>2</sub>, rather than the reduction of RuO<sub>2</sub>.

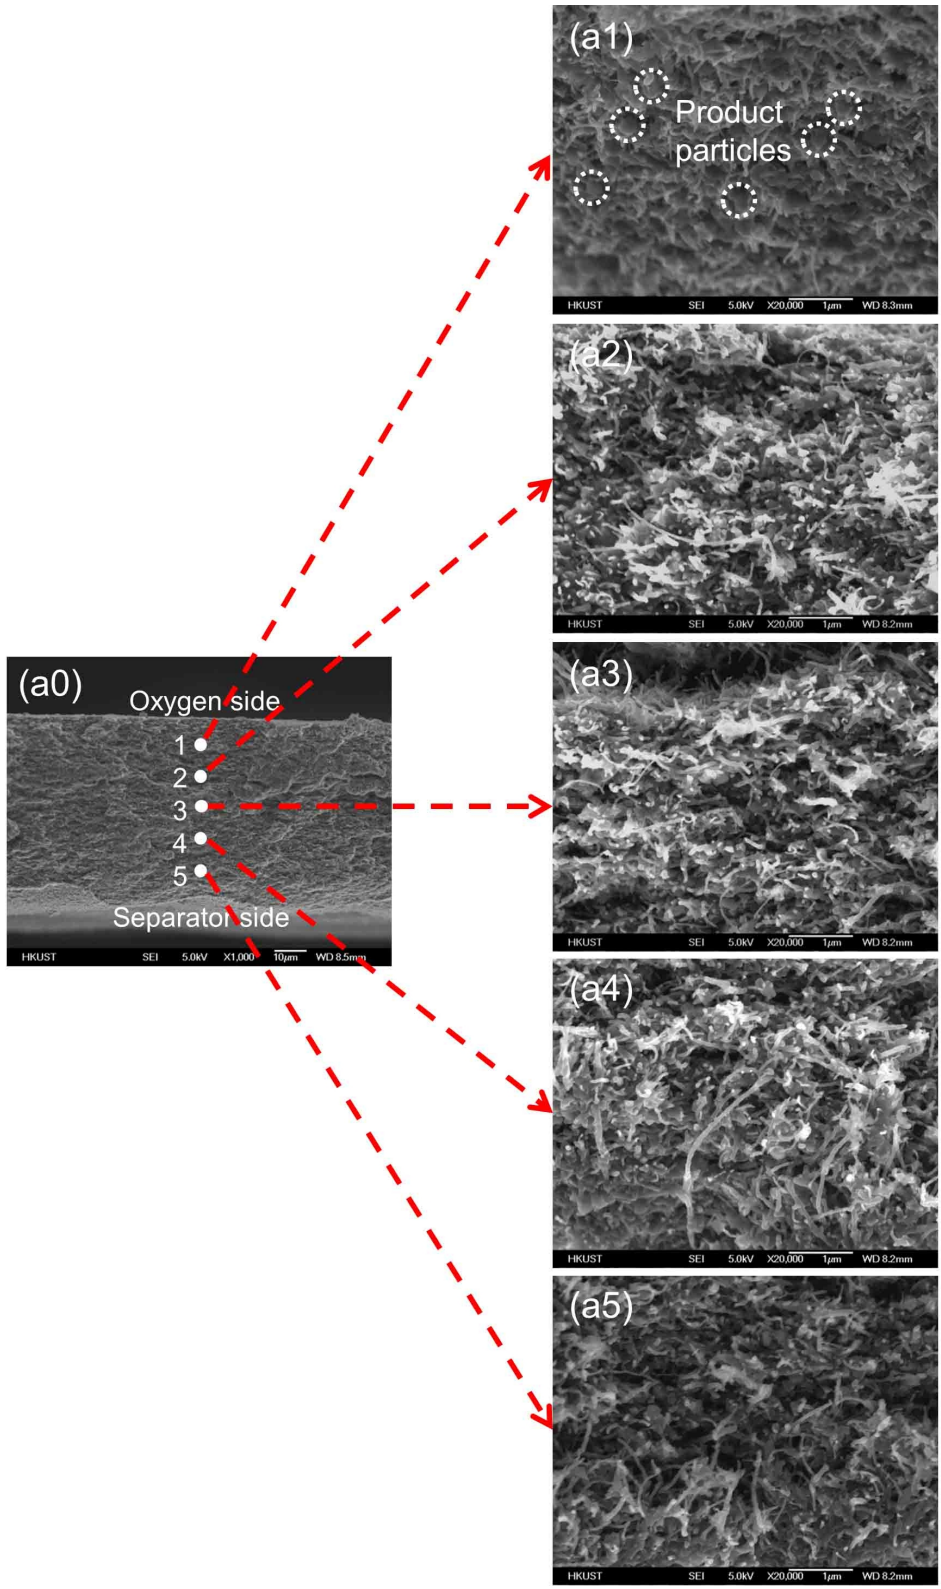



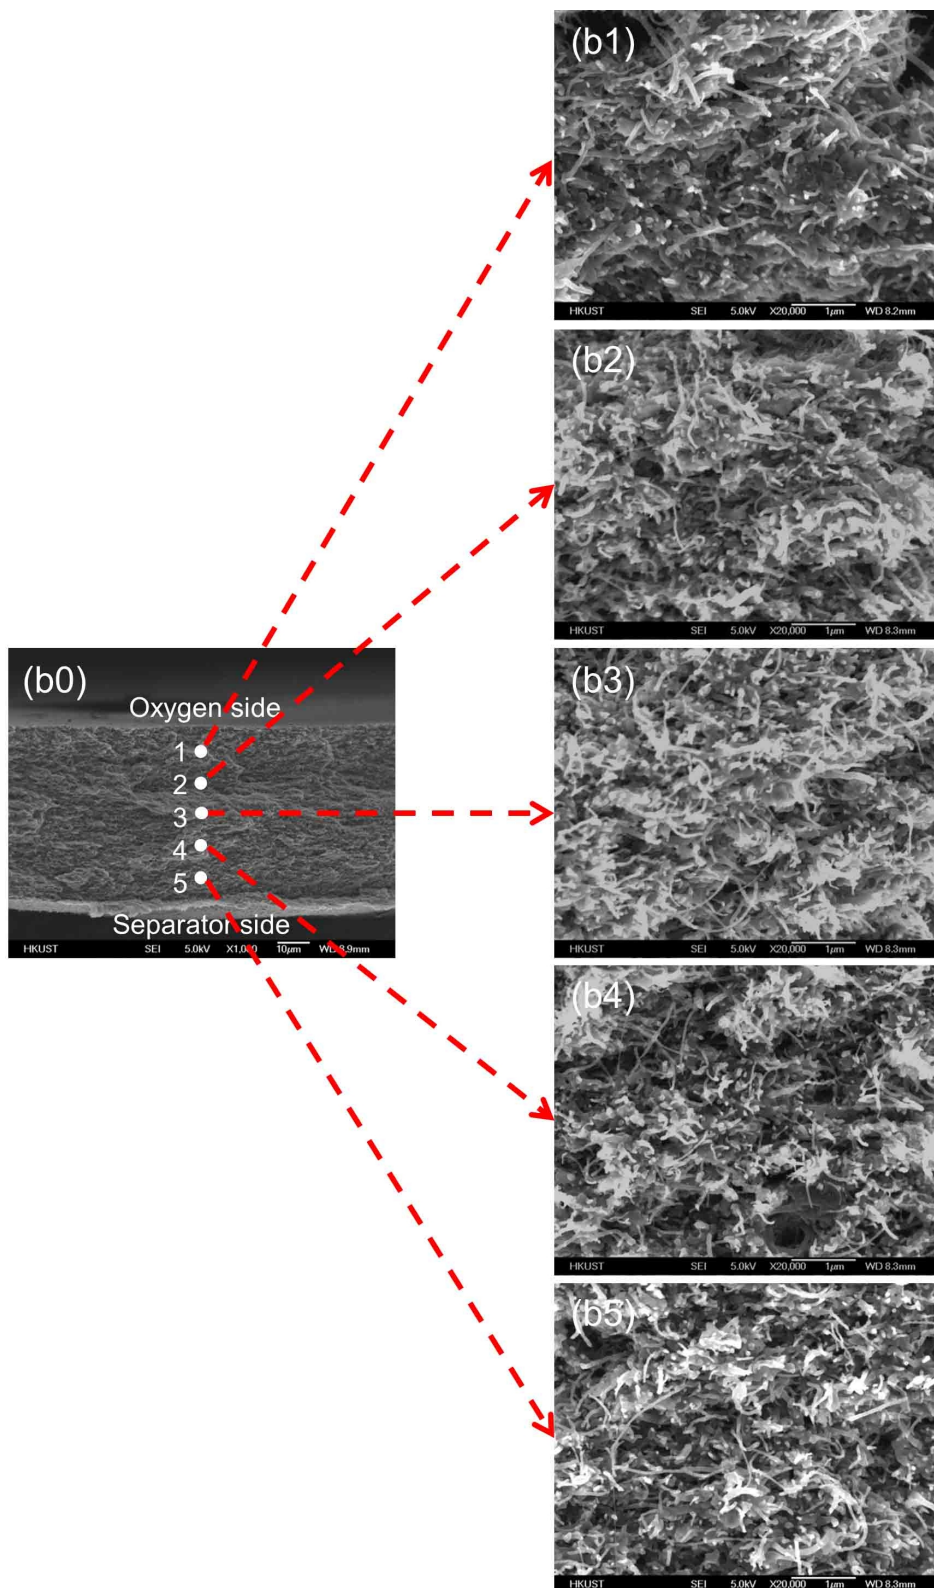

**Figure S7** SEM images of the discharged cathode from the oxygen side to the separator side: (a) Buckypaper and (b)  $\text{RuO}_2/\text{Buckypaper}$ . 0 corresponds to the cross-section; 1-5 corresponds to the detected point as marked. For the Buckypaper cathode, particle-like discharge product can be observed at point 1. For the  $\text{RuO}_2/\text{Buckypaper}$  cathode, only film-like discharge product can be observed.

## References

- [1] Z. Jian, P. Liu, F. Li, P. He, X. Guo, M. Chen and H. Zhou, *Angewandte Chemie-International Edition*, 2014, **53**, 442-446.
- [2] F. Li, D. Tang, T. Zhang, K. Liao, P. He, D. Golberg, A. Yamada and H. Zhou, *Advanced Energy Materials*, 2015, 1500249.
